# Supplementary material for: Highly Sensitive Whole-Cell Mercury Biosensors for Environmental Monitoring
Source: MDPI journal article supplement (doi:10.3390/bios14050246), 2024-05-13
Supplement: s1 [file s1]

## SUPPORTING INFORMATION

### Highly Sensitive Whole-Cell Mercury Biosensors for Environmental Monitoring

| Tube numbering                           | 1            | 2            | 3            | 4            | 5            | 6            | 7            | 8            |
|------------------------------------------|--------------|--------------|--------------|--------------|--------------|--------------|--------------|--------------|
| Intended HgBr <sub>2</sub> concentration | 2 mM         | 1 mM         | 500 $\mu$ M  | 250 $\mu$ M  | 125 $\mu$ M  | 50 $\mu$ M   | 25 $\mu$ M   | 10 $\mu$ M   |
| Volume from preceding tube               | -            | 500 $\mu$ l  | 500 $\mu$ l  | 500 $\mu$ l  | 500 $\mu$ l  | 400 $\mu$ l  | 500 $\mu$ l  | 400 $\mu$ l  |
| ddH <sub>2</sub> O                       | -            | 500 $\mu$ l  | 500 $\mu$ l  | 500 $\mu$ l  | 500 $\mu$ l  | 600 $\mu$ l  | 500 $\mu$ l  | 600 $\mu$ l  |
| Total volume                             | 1000 $\mu$ l |

| Tube numbering                           | 9            | 10           | 11           | 12           | 13           | 14           | 15           |
|------------------------------------------|--------------|--------------|--------------|--------------|--------------|--------------|--------------|
| Intended HgBr <sub>2</sub> concentration | 5 $\mu$ M    | 2 $\mu$ M    | 1 $\mu$ M    | 400 nM       | 200 nM       | 80 nM        | 40 nM        |
| Volume from preceding tube               | 500 $\mu$ l  | 400 $\mu$ l  | 500 $\mu$ l  | 400 $\mu$ l  | 500 $\mu$ l  | 400 $\mu$ l  | 500 $\mu$ l  |
| ddH <sub>2</sub> O                       | 500 $\mu$ l  | 600 $\mu$ l  | 500 $\mu$ l  | 600 $\mu$ l  | 500 $\mu$ l  | 600 $\mu$ l  | 500 $\mu$ l  |
| Total volume                             | 1000 $\mu$ l |

**Table S1.** Serial dilution of ionic mercury. A stock of 2 mM HgBr<sub>2</sub> was prepared by diluting solid powder in ddH<sub>2</sub>O. Serial dilutions were prepared prior to each assay and stored in a refrigerated environment (4°C). When applied to microcultures, 5  $\mu$ L of HgBr<sub>2</sub> solutions were diluted 1/40 in a total volume of 200  $\mu$ L of WCB. When applied to minicultures, 10  $\mu$ L of HgBr<sub>2</sub> solutions were diluted 1/1000 in a total volume of 10 mL of WCB.

| Name                         | DNA sequence (5'-3')                                                                                                                                                                                                                                                                                                                                                                                                                                                                                                                                                                                                                                                                                                                                                                                                                                                                                                                                                                                                                                                                                                                                                                                 |
|------------------------------|------------------------------------------------------------------------------------------------------------------------------------------------------------------------------------------------------------------------------------------------------------------------------------------------------------------------------------------------------------------------------------------------------------------------------------------------------------------------------------------------------------------------------------------------------------------------------------------------------------------------------------------------------------------------------------------------------------------------------------------------------------------------------------------------------------------------------------------------------------------------------------------------------------------------------------------------------------------------------------------------------------------------------------------------------------------------------------------------------------------------------------------------------------------------------------------------------|
| <b>Lambda TR2 terminator</b> | (PfoI)gtcacacgactaggacttcagatgggagtgagctgataccgcccattggtcgcgcagccgaacgagccgagcgcagag<br><b>GTTAGTTTTTTCATGACTTCCCTCTCCCCAAATAAAAAGGCCTGCGATTACCAGCAGGCCTGTT</b><br><b>ATTAGCTCAGTAATGTAGATGGTCAT</b> tggtgacgtggccactggc (XhoI)                                                                                                                                                                                                                                                                                                                                                                                                                                                                                                                                                                                                                                                                                                                                                                                                                                                                                                                                                                      |
| <b>merR gene</b>             | (XhoI)tggtcatcgtgcgtcacag <b>CTACGGCATAGCTGATCCCGCCAGGCTAGCCCCTCCTTGAAGCGAC</b><br><b>GCGATCAATGGACACGAAACATTACCGCGACGTGCATGACAAGCACATACCAACTCGCTCAAG</b><br><b>ACAGCCTCCATACGGGCCAGATCGGCCATTTTTTCGCGCACGTCTTTCAATTTATGCTCAGCTAA</b><br><b>AGAGCTAGCCTCTTCGCAATGCGTGCCGTCTTCTAAGCGCAGAAGTTCCGCAATCTCGTCAAGC</b><br><b>GAGAAACCAAGGCGCTGCGCCGACTTGACAAAACGGACGCGAGTAACGTCAGCTTCGCCATA</b><br><b>ACGACGGATGGAACCGTAAGGCTTATCGGGCTCAAGCAGAAGTCCTTTACGCTGATAGAAACG</b><br><b>GATTGTCTCAACATTTACGCCCCGCCGCTTTAGCGAATACGCCAATCGTCAAATTCTCCAAATTAT</b><br><b>TTCCAT</b> ctagat <b>tttctcctcttt</b> actctagtatg(SacI)                                                                                                                                                                                                                                                                                                                                                                                                                                                                                                                                                                                       |
| <b>429 promoter</b>          | (SacI)Tgtga <b>TTACCAACAACATACGAGCCGGAAGCATAAAGTGTATAAACA</b> aggattacggattcact<br>ggccgtactagtcgttttacaacgtcgtgactccgaaaacctggcggttacccaacttaatcgcttgcagcacatcccccttgcg<br>gctggcgtaatagcgacagaggcccgacccgccccttcgcaacagttggcagcctgacatggcgaatggacgcttgcctgg<br>tttccggcaccagaagcgggtccgggaactggcagagtgcattctccgccgatacttgcgtcgtcctcactcaactggcagatg<br>cacggttacgatgcgcccactacaccaacgtaacctatcccattacgggtcaatccgccgtttgttcgcgagcagaatcacgacg<br>ggttgtactcgctcacatttaattgtgatgaaaggaggctggctaggaaggccagacgcgaattattttgatggcgtatggaat<br>tacgttatcgactgtcacgcaatgcttctgcgtcaggcagccatcggaagctgtggtatggctgtcgcagtcgtaaatcagtcgt<br>cata(BamHI)<br><br><b>Parts of 429 promoter</b><br><b>-35 site: tgtaat</b><br><b>-10 site: aacata</b>                                                                                                                                                                                                                                                                                                                                                                                                                                                             |
| <b>PTn501-amilCP</b>         | (BamHI)attcgtgtcgtcaaggcga <b>ATCGCTTGACTCCGTACATGAGTACGGAAGTAAGGTTACGCTA</b><br><b>TCCAATTTCAATTCGAAAGGACAAGCAT</b> <u><b>ATGAGCGTGATTGCAAAGCAGATGACCTATAAAGT</b></u><br><u><b>TTATATGAGCGGCACCGTGAACGGCCATTATTTTGAAGTTGAAGGTGATGGTAAAGGCAAACC</b></u><br><u><b>GTATGAAGGTGAACAGACCGTTAAACTGACCGTTACCAAAGGTGGTCCGCTGCCGTTTGCATG</b></u><br><u><b>GGATATTCTGAGTCCGCAGTGTCAGTATGGTAGCATTCCGTTTACCAAATATCCGGAAGATATC</b></u><br><u><b>CCGGATTATGTGAAACAGAGCTTTCGGAAGGTTATACCTGGGAACGTATTATGAATTTTGAA</b></u><br><u><b>GATGGTGCCGTTGTACCGTTAGCAATGATAGCAGCATTACGGGTAATTGCTTTATCTACCACG</b></u><br><u><b>TGAAATTTAGCGGTCTGAATTTTCCGCCTAATGGTCCGTTATGCAGAAAAAAACCAAGGTTG</b></u><br><u><b>GGAACCGAATACCGAACGTCTGTTTGACGTGATGGTATGCTGCTGGGTAATAACTTTATGGC</b></u><br><u><b>ACTGAAACTGGAAGGTGGTGGTCATTATCTGTGTGAGTTCAAAACCACCTACAAAGCCAAAAA</b></u><br><u><b>ACCGGTTAAAATGCCTGGCTATCATTATGTGGATCGTAAACTGGATGTGACCAACCACAATAA</b></u><br><u><b>AGATTACACCAGCGTTGAACAGTGCGAAATTAGCATTGCACGTAAACCGGTTGTTGCCTAA</b></u> taataat<br>act( <u>NotI</u> )<br><br><b>Parts of PTn501 promoter</b><br><b>operator mer site: cgcttgactccgtacatgagtacggaagtaa</b><br><b>-35 site: ttgact</b><br><b>-10 site: taaggt</b> |
|                              |                                                                                                                                                                                                                                                                                                                                                                                                                                                                                                                                                                                                                                                                                                                                                                                                                                                                                                                                                                                                                                                                                                                                                                                                      |

|                             |                                                                                                                                                                                                                                                                                                                                                                                                                                                                                                                                                                                                                                                                                                                                                                                                                                                                                                                                                                                                                                                                                                                                                                                                                                                                                                                                                                                                                                                                                                                                                                                                                                                                                                                                                                                                                                                                                                                                                                                             |
|-----------------------------|---------------------------------------------------------------------------------------------------------------------------------------------------------------------------------------------------------------------------------------------------------------------------------------------------------------------------------------------------------------------------------------------------------------------------------------------------------------------------------------------------------------------------------------------------------------------------------------------------------------------------------------------------------------------------------------------------------------------------------------------------------------------------------------------------------------------------------------------------------------------------------------------------------------------------------------------------------------------------------------------------------------------------------------------------------------------------------------------------------------------------------------------------------------------------------------------------------------------------------------------------------------------------------------------------------------------------------------------------------------------------------------------------------------------------------------------------------------------------------------------------------------------------------------------------------------------------------------------------------------------------------------------------------------------------------------------------------------------------------------------------------------------------------------------------------------------------------------------------------------------------------------------------------------------------------------------------------------------------------------------|
| <b>BBa_B0014 terminator</b> | (NotI)agagTCACACTGGCTCACCTTCGGGTGGGCCTTTCTGCGTTTATATACTAGAGAGAGAAT ATAAAAAGCCAGATTATTAATCCGGCTTTTTTATTATTTccggtcagtgagcgagggtaccgaagcgcaaga gccctctggagctgatcttgtgtgtag(Pscl)                                                                                                                                                                                                                                                                                                                                                                                                                                                                                                                                                                                                                                                                                                                                                                                                                                                                                                                                                                                                                                                                                                                                                                                                                                                                                                                                                                                                                                                                                                                                                                                                                                                                                                                                                                                                               |
| <b>pUC57 vector</b>         | (Pscl)gagcaaaaggccagcaaaaggccaggaaccgtaaaaaggccgcttgctggcggttttccataggctccgccccctg acgagcatcacaaaaatcgacgctcaagtcagaggtggcgaaacccgacaggactataaagataccaggcggttccccctgg aagctccctcgtgcgctctcgttccgaccctgccgcttacggatacctgtccgcctttcccttcgggaagcggtggcgctttc tcatagctcacgctgtaggtatctcagttcgggtgtaggtcgcttccgctcaagctgggctgtgtgcacgaacccccgttcagcccg accgctgcgccttatccgtaactatcgtcttgagtcgaacccggtaagacacgacttatcgccactggcagcagccactggta acaggattagcagagcgaggtatgtagcggtgctacagagttcttgaagtgggtggcctaactacggctacactagaagaaca gtatttggtatctgcgctcgtgtagcagttaccttcggaaaaaagagttgtagctcttgatccggcaaaacaaccaccgctg gtagcggtgggtttttgttgcaagcagcagattacgcgcagaaaaaaggatctcaagaagatcctttgatcttttctacggg gtctgacgctcagtggaacgaaaactcacgttaagggttttggctcatgagattatcaaaaaggatcttcacttagatcctttta aattaaaaatgaagttttaaatcaatctaaagtatatatgagtaaaacttggtctgacagttaccaatgcttaatcagtgaggcac ctatctcagcgatctgtctatttcgttcatcatagttgcctgactccccgctgctgtagataactacgatacgggagggttaccat ctggccccagtgctcaatgataccgcgagacccacgctcaccggctccagatttatcagcaataaacagccagccggaagg gccgagcgcagaagtggtcctgcaactttatccgctccatccagtcattatgttgccgggaagctagagtaagtagttcgc cagttaatagtttgcgaacggttggcattgtacaggcatcggtgtcacgctcgtcttggtatgggttcattcagctccg gttccaacgatcaaggcgagttacatgatccccatgttggtgcaaaaaagcggttagctccttcggctcctcgatcgtgtcag aagtaagttggcgcagtggtatcactcatggttatggcagcactgcataattcttactgtcatgccatccgtaagatgcttttc tgtgactggtgagtactcaaccaagtcattctgagaatagtgtatgcggcgaccgagttgctcttgccggcgctcaatacgggat aataccgcgccacatagcagaactttaaaagtgtcatcattggaaaacgttcttcggggcgaaaactctcaaggatcttaccg ctgttgagatccagttcgtatgaaccactcgtgcaccaactgatcttcagcatcttttactttcaccagcggttctgggtgagca aaaacaggaaggcaaaatgccgcaaaaaagggaataagggcgacacggaaatgttgaaatactcatacttctcttttcaata ttattgaagcatttatcagggttattgtctcatgagcggatacatatttgatgtatttagaaaaataaacaataggggttccgc gcacatttccccgaaaagtgcacctgacgtctaagaaaccattattatcatgacattaacctataaaaataggcggtatcacga ggccctttcgtctcgcgcttccggtgatgacggtgaaaaccttgacacatgcagc(PfoI) |
| <b>Gene block rfp gene</b>  | catcgcacctacatctgtattaacgaagcggtgtgggcgcagATGGCAAGCAGCGAAGATGTGATCAAAGAAT TTATGCGTTTCAAGGTGCGTATGGAAGGTAGCGTTAATGGTCATGAATTTGAAATTGAAGGTG AAGGCGAAGGTGCTCCGTATGAAGGCACCCAGACCGCAAAACTGAAAGTTACCAAGGTGGT CCGTGCCGTTTGCATGGGATATTCTGAGTCCGCAGTTTCAGTATGGTAGCAAAGCATACTGTTA AACATCCGGCAGATATCCCGATTATCTGAAACTGAGCTTTCGGGAAGGTTTTAAATGGGAAC GTGTGATGAATTTGAAGATGGTGGTGTGTTACCGTTACACAGGATAGCAGCCTGCAGGATG GTGAATTTATCTATAAAGTTAAACTGCGTGGCACGAATTTCCGAGTGATGGTCCGGTTATGCA GAAAAAACaATGGGTTGGGAAGCAAGCACCGAACGTATGTATCCGGAAGATGGCGCACTGA AAGGTGAAATCAAATGCGTCTGAAGCTGAAAGATGGCGGTCAATTATGATGCAGAAGTTAAA ACCACCTACATGGCCAAAAAACCGGTTACGCTGCCTGGTGCATATAAAACCGATATTAAACTG GATATCACCAGCCACAACGAGGATTATACCATTGTTGAACAGTATGAACGTGCAGAAGGTGCG CATAGTACCGGTGCATAA <u>taagcggccgcggtcgttagatagccgttatgtcat</u>                                                                                                                                                                                                                                                                                                                                                                                                                                                                                                                                                                                                                                                                                                                                                                                                                                                                                                                                                                                                                                                                                                                                                                                           |

**Table S2.** Sequences of the genetic constructs used in this study. The DNA sequence in capital letters corresponds to the circuit part indicated in the table. The *RBS<sub>merR</sub>* sequence (Bba\_K1758342) is underlined in blue. The *amilCP* and *rfp* genes are noted in blue and red text, respectively, and were flanked by *NdeI* (underlined in dark green) and *NotI* (underlined in purple).

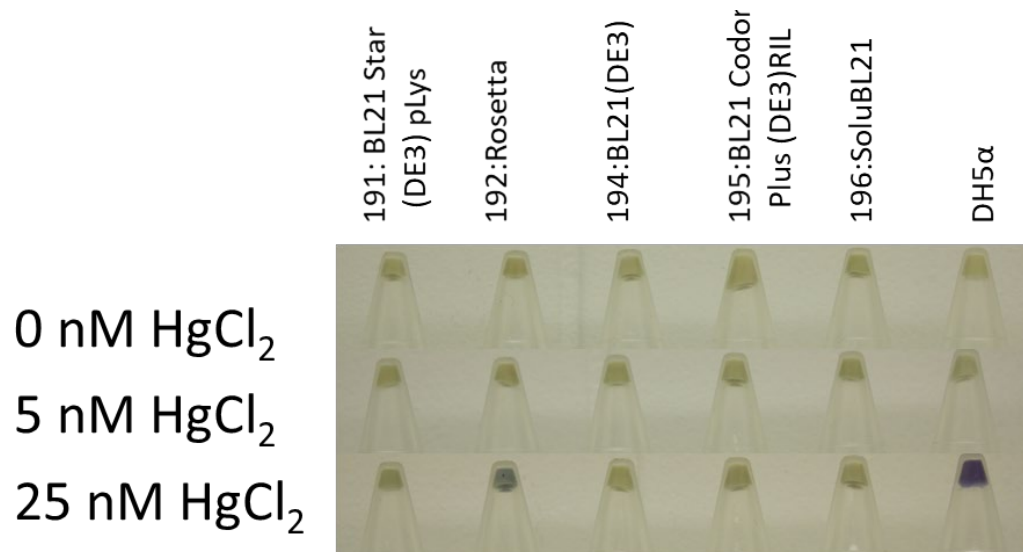

**Figure S1:** Testing various bacterial chassis for our biosensor circuit. Minicultures were prepared and pelleted as described in the Materials and Methods section. Under similar conditions, cultures of DH5 $\alpha$  cells show higher, more conspicuous signal.

A)

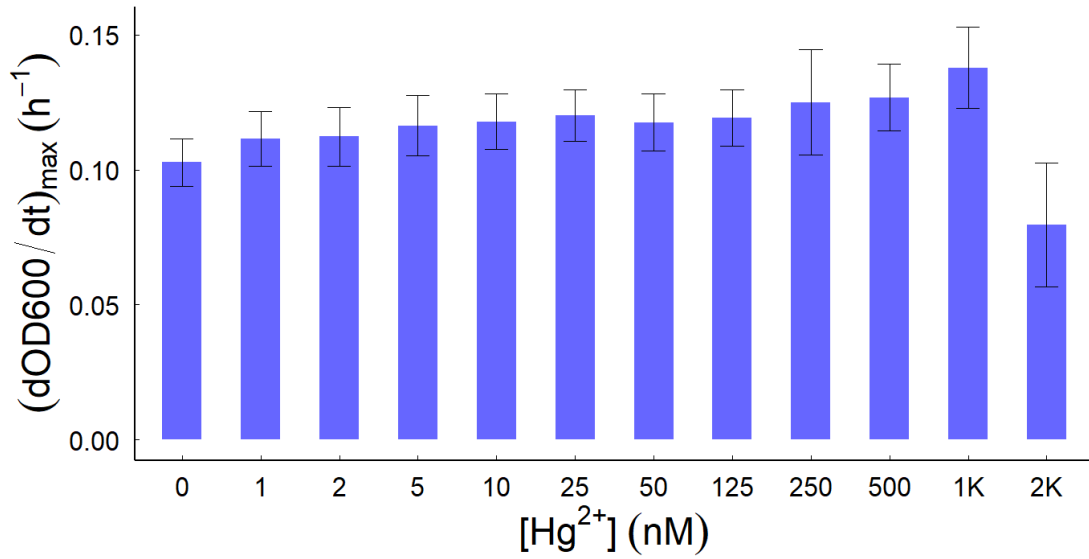

B)

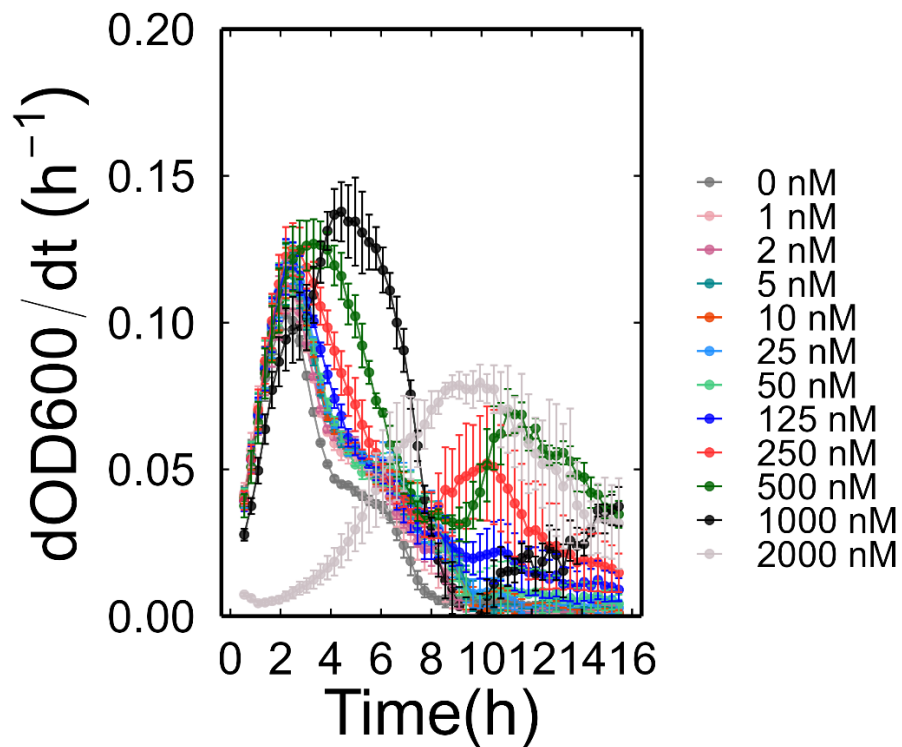

**Figure S2.** Bacterial growth analysis of Mer-RFP biosensor. (A) Maximum growth rate of the biosensor in response to various concentrations of HgBr<sub>2</sub>. Kruskal-Wallis One-Way ANOVA revealed a significantly reduced growth rate for the culture exposed to 2,000 nM Hg<sup>2+</sup> compared to other conditions ( $p < 0.001$ ). (B) Continuous calculation of growth rates for the Mer-RFP biosensor. Peaks were identified and plotted in the previous graph within the 2-5 hour interval, except for the highest concentration, which was observed at 10 hours. Error bars represent the standard error from three independent replicates.

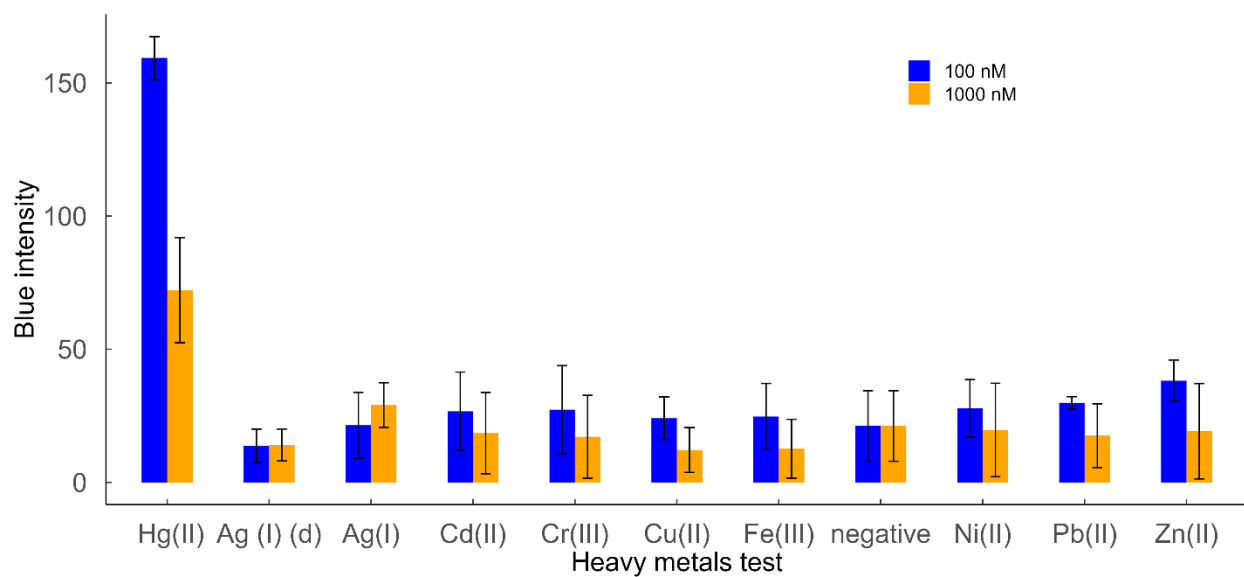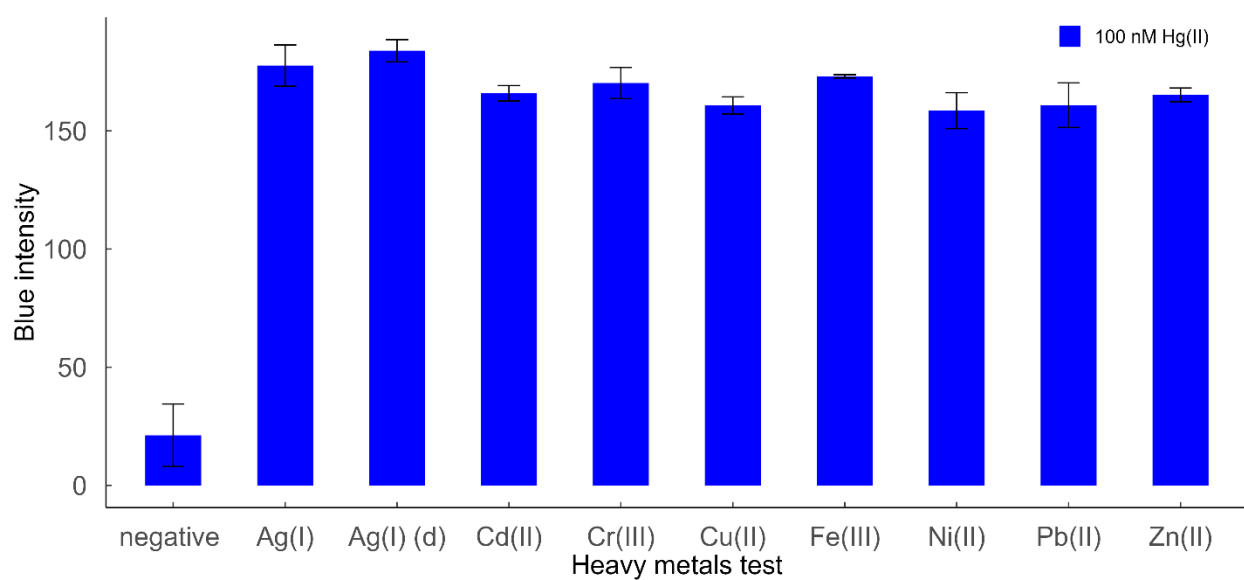

**Figure S3.** Selectivity of the Mer-Blue biosensor. Top panel, response in the presence of 100 nM of various metal ions. Bottom panel, response to 100 nM Hg<sup>2+</sup> in the presence of additional 100 nM of various metal ions.

Primary culture

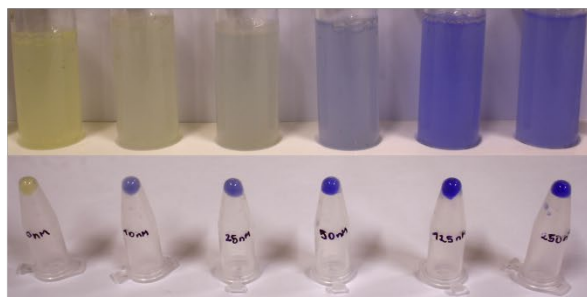

After 3 passages

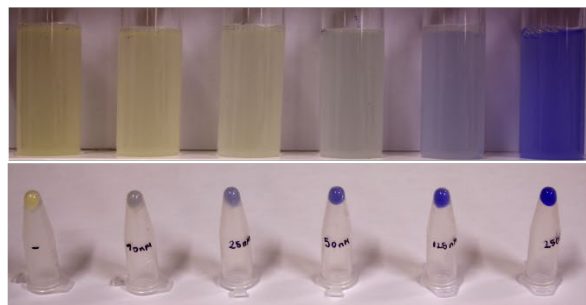

After 5 passages

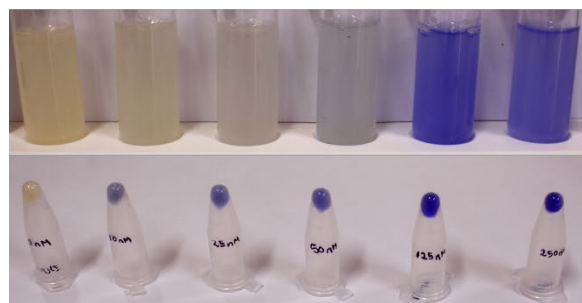

0 10 25 50 125 250

[Hg<sup>2+</sup>] nM

After 10 passages

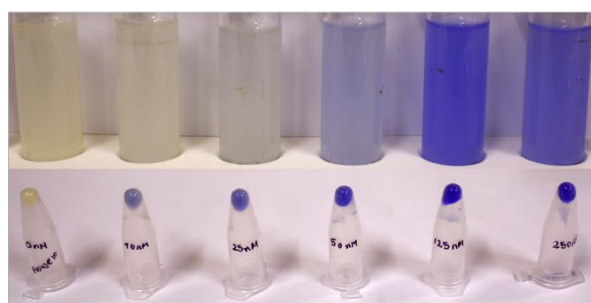

0 10 25 50 125 250

[Hg<sup>2+</sup>] nM

**Figure S4.** Stability of the Mer-Blue Biosensor. Primary culture: Freshly transformed DH5 $\alpha$  cells were cultured from a single colony on solid agar to an overnight liquid culture, which was then utilized to initiate the biosensor test, as outlined in the Materials and Methods section. After N passages: An overnight culture was diluted 1/20 in fresh medium containing ampicillin (AMP) and incubated for 24 hours; this process was repeated N times. Subsequently, the biosensor test was performed as described previously.

### Samples from Cajamarca

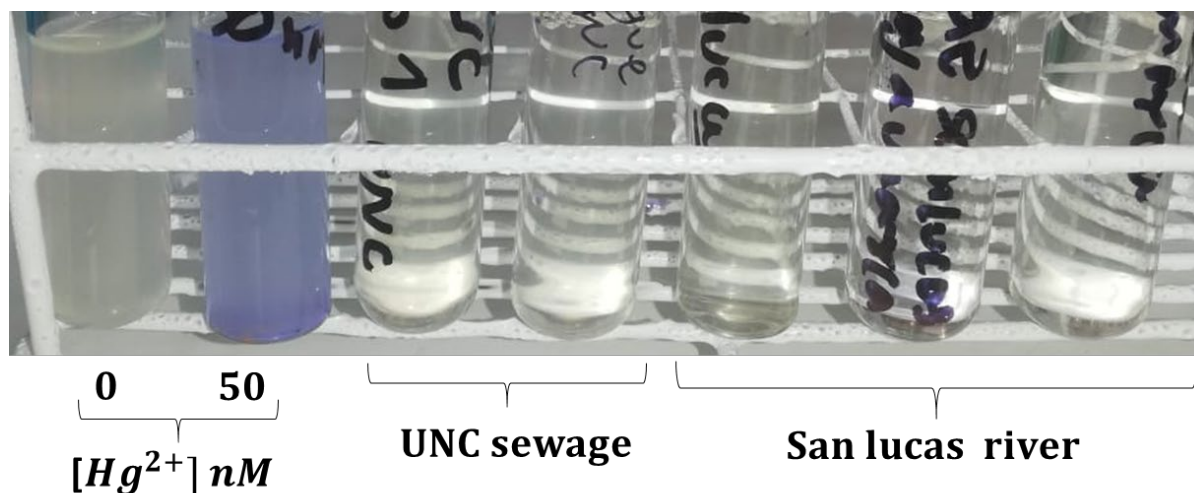

### Samples from Iquitos

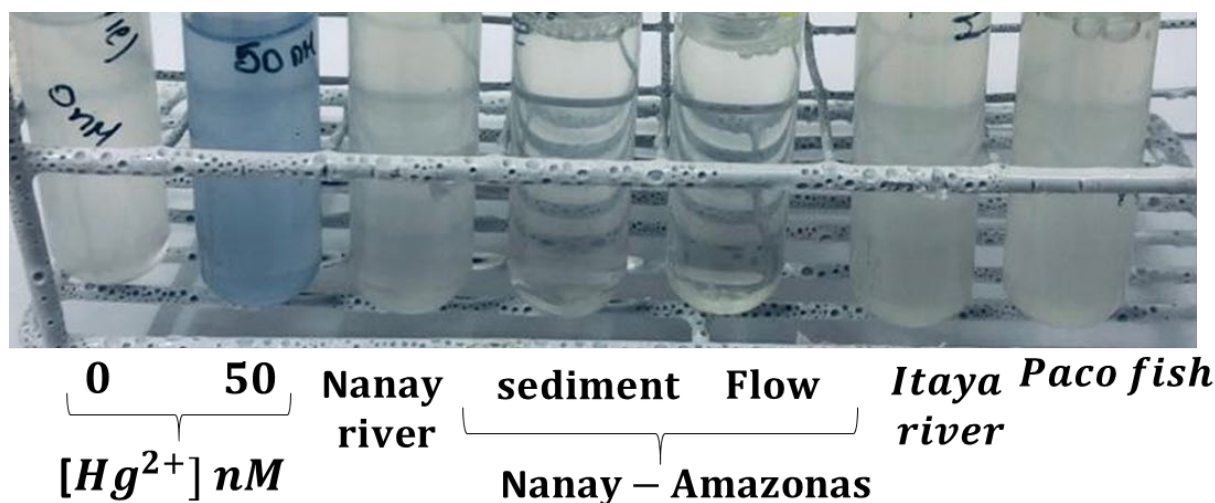

**Figure S5.** Exploratory Assays of Samples from Cajamarca and Iquitos, Peru. Controls of 0 and 50 nM HgBr<sub>2</sub> were included in each test, depicted on the left side of the image. Cajamarca samples were collected from wastewater from the National University of Cajamarca (UNC) and from the San Lucas River. Iquitos samples were collected from the Nanay and Itaya rivers, as well as from the confluence of the Nanay and Amazon rivers (Nanay-Amazonas). All liquid samples were passed through a 0.22 µm syringe filter for sterilization. A small solid sample was taken from fish from a local market (Paco fish), minced with water, and filtered through a 0.22 µm syringe filter. The samples were analysed according to the protocol outlined in the Materials and Methods section. Note: The pH levels of samples from rivers ranged between 6 and 7.



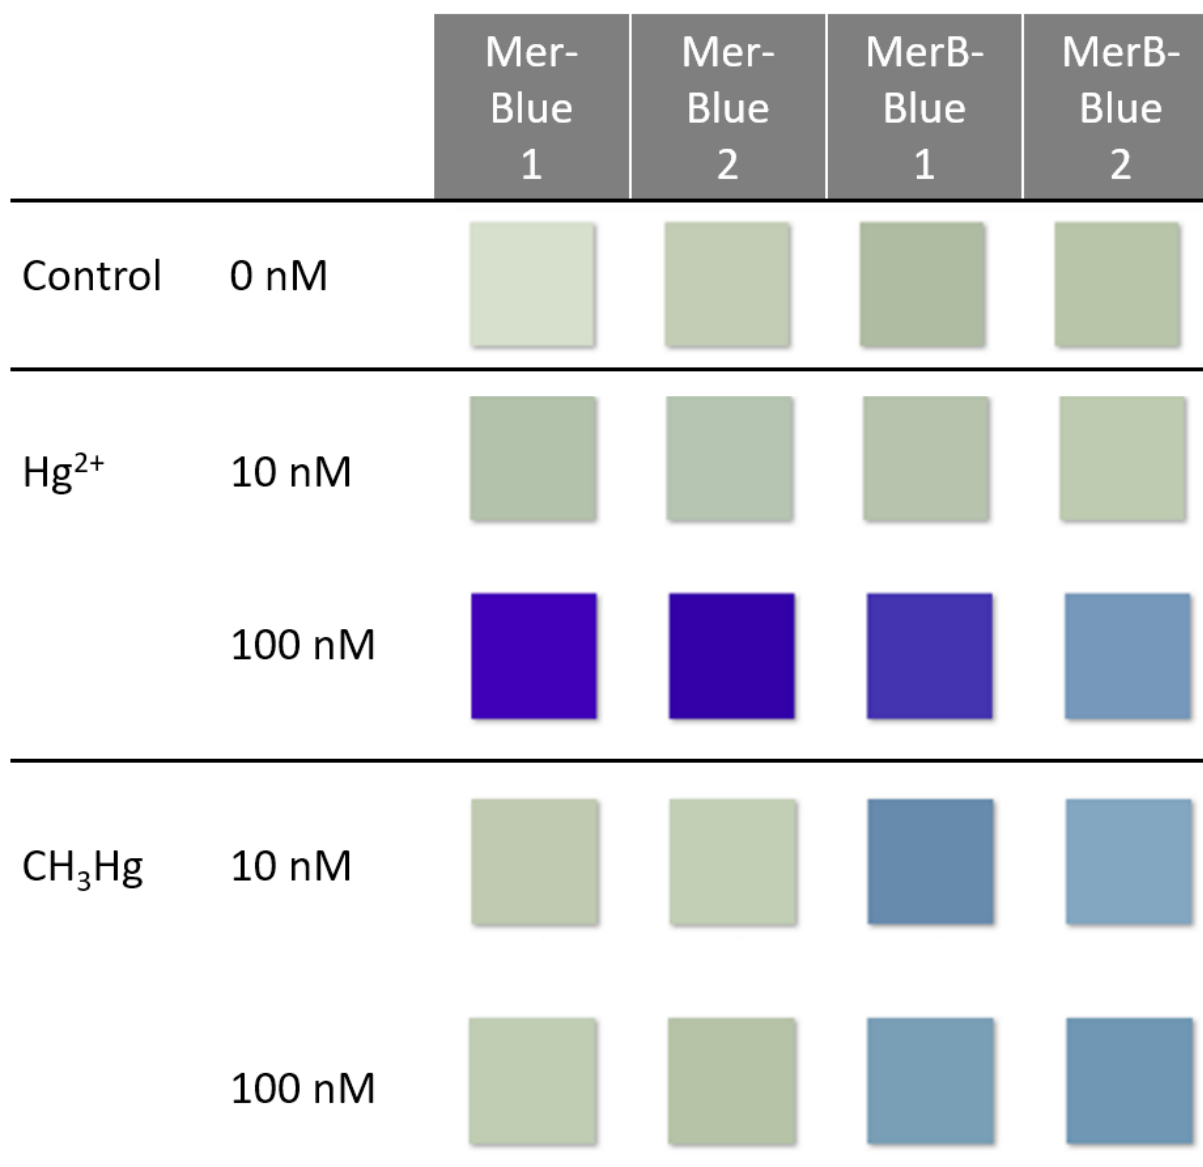

**Figure S6.** Methylmercury assays. DH5 $\alpha$  cells were transformed with pUC-Mer-Blue (Mer-Blue) or with a modified version of this plasmid with the additional coding for the constitutive expression of organomercurial lyase (MerB-Blue). Two single colonies of each biosensor were picked and grown to seed minicultures with the indicated concentrations of Hg<sup>2+</sup> or methylmercury, following the protocol outlined in the Materials and Methods section. The panels display the blue intensity of 9 pixels located in the centre of the pellets collected from each miniculture.

| No | Host cells                         | Biosensing modules                                       | linear range (nM) | LOD (nM) | Specifcity         | Ref        |
|----|------------------------------------|----------------------------------------------------------|-------------------|----------|--------------------|------------|
| 1  | <i>E. coli</i> DH5α                | zntR-Pznt-egfp-hj1                                       | 2,500-7,500       | 1000     | $Hg^{2+}, Cd^{2+}$ | (1)        |
| 2  | <i>E. coli</i> JM109               | chromosomally based merRPmer-gfp                         | 100-1,700         | -        | $Hg^{2+}$          | (2)        |
| 3  | <i>E. coli</i> TOP10               | merR-Pmer-mcherry                                        | 6,250-200,000     | -        | $Hg^{2+}$          | (3)        |
| 4  | <i>E. coli</i> DH5α                | merR-Pmer-rfp                                            | 50-10,000         |          | $Hg^{2+}$          | (4)        |
| 5  | <i>E. coli</i> DH5α                | mer-rfp quorum-sensing system                            | 10-250            | 10       | $Hg^{2+}$          | (5)        |
| 6  | <i>Sphingobium</i> SA2             | chromosomally based partial merA-gfp                     | 20-40             | -        | $Hg^{2+}$          | (6)        |
| 7  | <i>Pseudomonas putida</i>          | chromosomally based merRPmer-egfp                        | 200-1400          | -        | $Hg^{2+}$          | (7)        |
| 8  | <i>Enterobacter cloacae</i>        | merR-Pmer-lux                                            | 2-7980            | 1        | $Hg^{2+}$          | (8)        |
| 9  | <i>Pseudomonas aeruginosa</i> PAO1 | merR-Pmer-phzM-Pmer-phzS-pAK1900                         | 25-1,000          | 10       | $Hg^{2+}$          | (9)        |
| 10 | <i>E. coli</i> DH5α                | merR mer-ompA-mcherry-pSB1A2                             | 0.1-100           | 0.1      | $Hg^{2+}$          | (10)       |
| 11 | <i>E. coli</i> DH5α                | merR558                                                  | 1-100             | 1        | $Hg^{2+}, Cd^{2+}$ | (11)       |
| 12 | <i>E. coli</i> TOP10               | exponential phase                                        | 780-12,500        | 390      | $Hg^{2+}$          | (12)       |
|    |                                    | merR-Pmer-vioABCDE                                       | -                 | 6        | $Hg^{2+}$          |            |
| 13 | <i>E. coli</i> TOP10               | J109- $P_{merT}$ - <i>gfp</i>                            | -                 | 1.1      | $Hg^{2+}$          | (13)       |
|    |                                    | 3-layer (RS-RinA-E11)(4A3)+ $P_{e11}$ - <i>gfp</i> (1K3) | -                 | 0.037    | $Hg^{2+}$          |            |
| 14 | <i>E. coli</i> DH5α                | Mer-Blue                                                 | 2.3-125           | 2.3      | $Hg^{2+}$          | This study |
|    |                                    | Mer-RFP                                                  | 1.6-1,000         | 1.6      | $Hg^{2+}$          |            |

**Table S3.** Reported whole-cell biosensors for ionic mercury detection.

## References

1. Kim H, Lee W, Yoon Y. Heavy metal(loid) biosensor based on split-enhanced green fluorescent protein: development and characterization. *Appl Microbiol Biotechnol*. 2019;103(15):6345–52.
2. Priyadarshi H, Alam A, Gireesh-Babu P, Das R, Kishore P, Kumar S, et al. A GFP-based bacterial biosensor with chromosomally integrated sensing cassette for quantitative detection of Hg(II) in environment. *J Environ Sci* [Internet]. 2012;24(5):963–8. Available from: [http://dx.doi.org/10.1016/S1001-0742\(11\)60820-6](http://dx.doi.org/10.1016/S1001-0742(11)60820-6)
3. Zhang NX, Guo Y, Li H, Yang XQ, Gao CX, Hui CY. Versatile artificial mer operons in *Escherichia coli* towards whole cell biosensing and adsorption of mercury. *PLoS One* [Internet]. 2021;16(5 May):1–14. Available from: <http://dx.doi.org/10.1371/journal.pone.0252190>
4. Guo M, Wang J, Du R, Liu Y, Chi J, He X, et al. A test strip platform based on a whole-cell microbial biosensor for simultaneous on-site detection of total inorganic mercury pollutants in cosmetics without the need for predigestion. *Biosens Bioelectron* [Internet]. 2020;150(November):111899. Available from: <https://doi.org/10.1016/j.bios.2019.111899>
5. Paquin F, Rivnay J, Salleo A, Stingelin N, Silva C. Engineered Highly Sensitive Whole-Cell Mercury Biosensors Based on Positive Feedback Loop from Quorum-Sensing System. *R Soc Chem* [Internet]. 2017;3. Available from: <http://xlink.rsc.org/?DOI=C5TC02043C>
6. Mahbub KR, Krishnan K, Naidu R, Megharaj M. Development of a whole cell biosensor for the detection of inorganic mercury. *Environ Technol Innov* [Internet]. 2017;8:64–70. Available from: <http://dx.doi.org/10.1016/j.eti.2017.04.003>
7. Xian-Gui L, Wei H, Cheng H, Ting M, Wen-Hui Z. A chromosomally based luminescent bioassay for mercury detection in red soil of China. *Appl Microbiol Biotechnol*. 2010;87(3):981–9.
8. Din G, Hasan F, Conway M, Denney B, Ripp S, Shah AA. Engineering a bioluminescent bioreporter from an environmentally sourced mercury-resistant *Enterobacter cloacae* strain for the detection of bioavailable mercury. *J Appl Microbiol*. 2019;127(4):1125–34.
9. Wang D, Zheng Y, Fan X, Xu L, Pang T, Liu T, et al. Visual detection of Hg<sup>2+</sup> by manipulation of pyocyanin biosynthesis through the Hg<sup>2+</sup> dependent transcriptional activator MerR in microbial cells. *J Biosci Bioeng*. 2019;
10. Wang D, Zheng Y, Xu L, Fan X, Wei N, Jin N, et al. Engineered cells for selective detection and remediation of Hg<sup>2+</sup> based on transcription factor MerR regulated cell surface displayed systems. *Biochem Eng J* [Internet]. 2019;150(April):107289. Available from: <https://doi.org/10.1016/j.bej.2019.107289>

11. Du R, Guo M, He X, Huang K, Luo Y, Xu W. Feedback regulation mode of gene circuits directly affects the detection range and sensitivity of lead and mercury microbial biosensors. *Anal Chim Acta* [Internet]. 2019;1084(17):85–92. Available from: <https://doi.org/10.1016/j.aca.2019.08.006>
12. Guo Y, Hui C ye, Liu L, Chen M peng, Huang H ying. Development of a bioavailable Hg(II) sensing system based on MerR-regulated visual pigment biosynthesis. *Sci Rep* [Internet]. 2021;11(1):1–14. Available from: <https://doi.org/10.1038/s41598-021-92878-6>
13. Wan X, Volpetti F, Petrova E, French C, Maerkl SJ, Wang B. Cascaded amplifying circuits enable ultrasensitive cellular sensors for toxic metals. *Nat Chem Biol* [Internet]. 2019;15(5):540–8. Available from: <http://dx.doi.org/10.1038/s41589-019-0244-3>
